# Supplementary material for: A rhodamine-based dual chemosensor for the naked-eye detection of Hg2+ and enhancement of the fluorescence emission for Fe3+
Source: Royal Society of Chemistry journal article supplement (doi:10.1039/d0pp00302f), 2020-11-11
Supplement: d0pp00302f1.pdf [file d0pp00302f1.pdf]

*Electronic Supplementary Material*

**A rhodamine-based dual chemosensors for the naked-eyes  
detection of Hg<sup>2+</sup> and enhancement of the fluorescence emission  
for Fe<sup>3+</sup>**

Jian-Peng Hu,<sup>a</sup> Hao-Hang Yang,<sup>a</sup> Qi Lin,<sup>a</sup> Hong Yao,<sup>a</sup> You-Ming Zhang,<sup>a, b</sup> Tai-Bao Wei<sup>a,\*</sup> and  
Wen-Juan Qu<sup>a,\*</sup>

<sup>a</sup> *Key Laboratory of Polymer Materials of Gansu Province, Research Center of Gansu Military  
and Civilian Integration Advanced Structural Materials, College of Chemistry and Chemical  
Engineering, Northwest Normal University, Anning East Road 967, Lanzhou, Gansu, 730070, P.  
R. China.*

<sup>b</sup> *Deputy Director-General of Gansu Natural Energy Research Institute, Renmin Road 23,  
Lanzhou, Gansu, 730000, P. R. China.*

## Content

|                                                                                                               |    |
|---------------------------------------------------------------------------------------------------------------|----|
| The synthetic route of TR.....                                                                                | 3  |
| <sup>1</sup> H NMR spectrum of RBA.....                                                                       | 5  |
| <sup>13</sup> C NMR spectrum of RBA .....                                                                     | 6  |
| ESI/MS of RBA.....                                                                                            | 7  |
| <sup>1</sup> H NMR spectrum of TR.....                                                                        | 8  |
| ESI/MS of TR.....                                                                                             | 9  |
| UV-vis of sensor (TR) for different aqueous systems of Hg <sup>2+</sup> .....                                 | 10 |
| Fluorescence spectra of sensor TR for different aqueous systems of Fe <sup>3+</sup> .....                     | 11 |
| Determine of the UV-vis detection limit for Hg <sup>2+</sup> .....                                            | 12 |
| Determine of the fluorescent detection limit for Fe <sup>3+</sup> .....                                       | 13 |
| Fluorescence spectra of TR in various pH values EtOH /H <sub>2</sub> O (9:1, v/v) HEPES buffer solution ..... | 14 |
| Mass spectrum between TR and Hg <sup>2+</sup> .....                                                           | 15 |
| Mass spectrum between TR and Fe <sup>3+</sup> .....                                                           | 16 |
| IR spectra of compound TR、 TR+Hg <sup>2+</sup> and TR+Fe <sup>3+</sup> .....                                  | 17 |

## The synthetic route of TR.

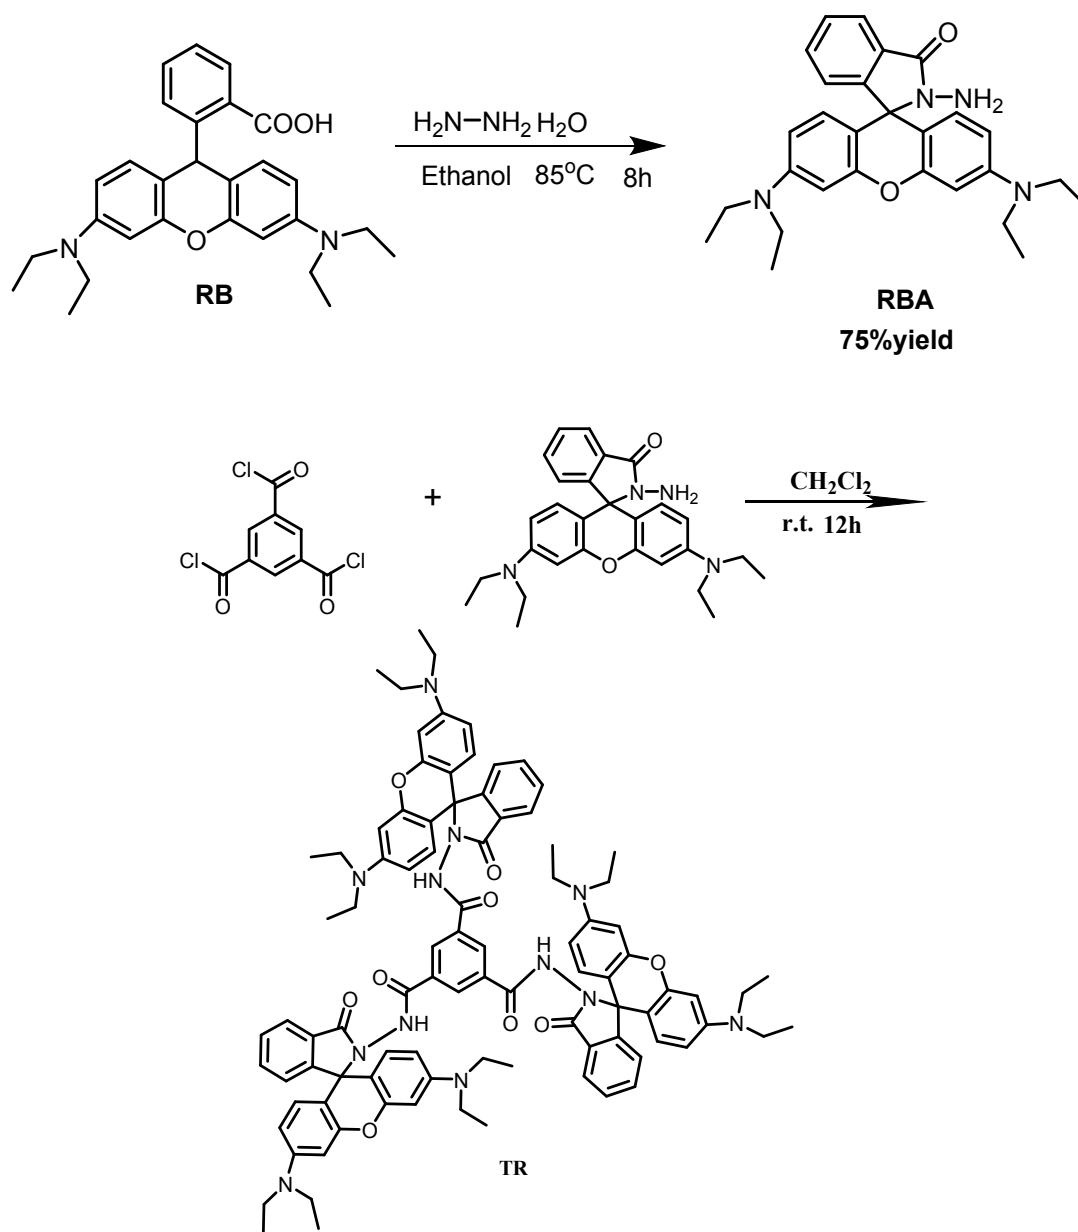

**Scheme S1.** The synthesis of TR.

Synthesis of **RBA**. Rhodamine B (1.20 g, 2.5 mmol) was placed in a 100mL flask and subsequently dissolved in 30 mL ethanol. Stirred at room temperature for 30 min and dropped 3.0 mL of hydrazine hydrate (85%) into it. The stirred mixture was heated at  $85^\circ\text{C}$  and refluxed for 8 h. The solution changed from dark purple to light orange and became clear. The mixture was cooled and the solvent was removed under reduced pressure. Add 1 mol/L (about 50 mL) to the flask to produce a clear red solution. On this basis, 1mol/L (about 70 mL) was added and stirred until the

solution pH reached 9~10. The resulting precipitate was filtered and washed 3 times with 15 mL of water. Then thoroughly dried under vacuum and the reaction afforded 0.83 g (75%) as pink solid.  $^1\text{H}$  NMR (400 MHz,  $\text{CDCl}_3$ )  $\delta$  (ppm): 7.94 (s, 1H), 7.44 (d,  $J = 6.9$  Hz, 2H), 7.11 (s, 1H), 6.46 (s, 2H), 6.41 (s, 2H), 3.61 (s, 2H), 3.33 (s, 8H), 1.16 (t,  $J = 7.0$  Hz, 12H).  $^{13}\text{C}$  NMR (400 MHz,  $\text{CDCl}_3$ )  $\delta$  166.1, 153.8, 151.5, 148.9, 132.5, 128.1, 123.8, 122.9, 108.0, 104.6, 99.98, 65.9. ESI-MS  $m/z$ : ( $\text{M} + \text{H}$ ) $^+$  calculated  $\text{C}_{28}\text{H}_{33}\text{N}_4\text{O}_2$  457.2595; Found 457.2597.

# $^1\text{H}$ NMR spectrum of **RBA**

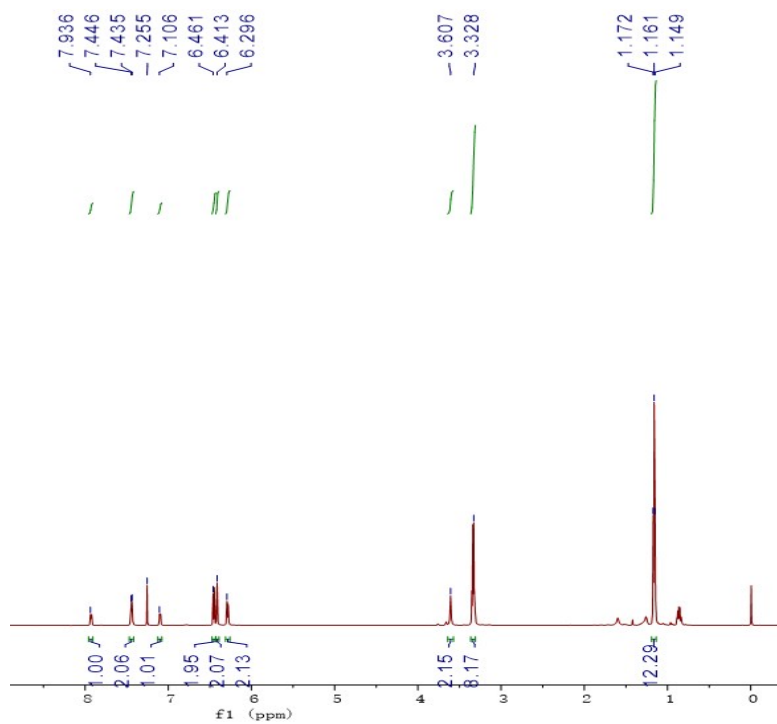

**Figure S1.**  $^1\text{H}$  NMR spectrum of **RBA** in  $\text{CDCl}_3$

# $^{13}\text{C}$ NMR spectrum of **RBA**

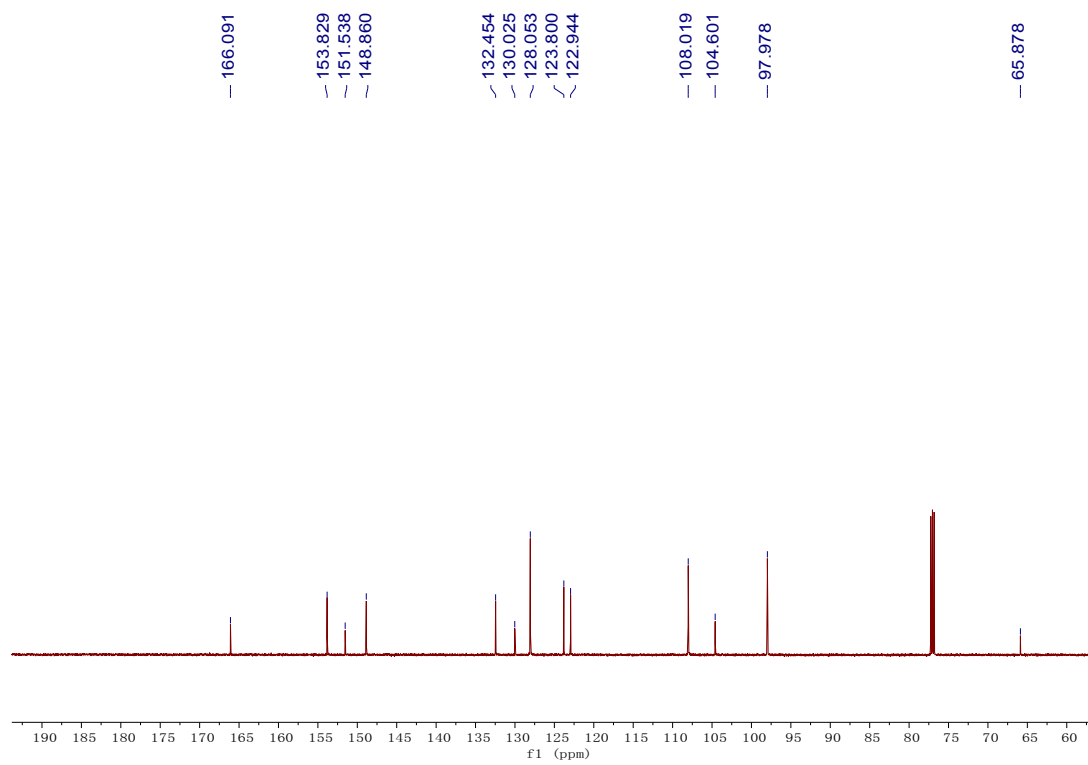

**Figure S2.**  $^{13}\text{C}$  NMR spectrum of **RBA** in  $\text{CDCl}_3$

## ESI/MS of RBA

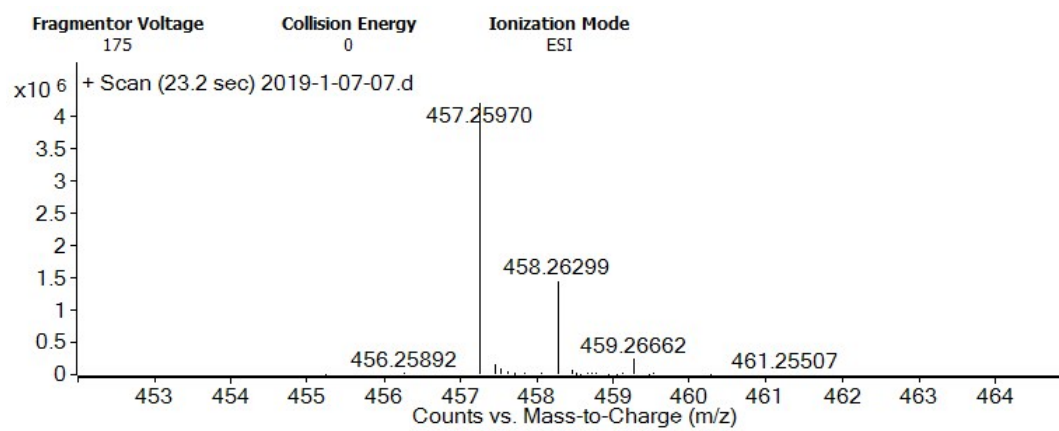

**Figure S3.** The ESI/MS of **RBA** in CH<sub>3</sub>CN

# $^1\text{H}$ NMR spectrum of TR

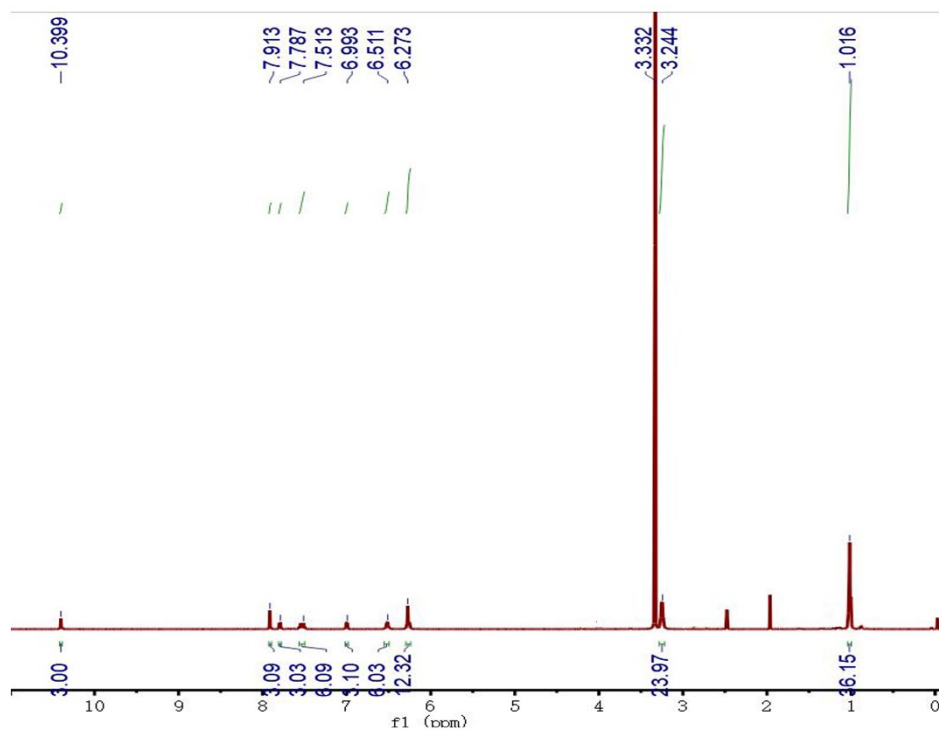

**Figure S4.**  $^1\text{H}$  NMR spectrum of TR in DMSO- $d_6$ .



# ESI/MS of TR

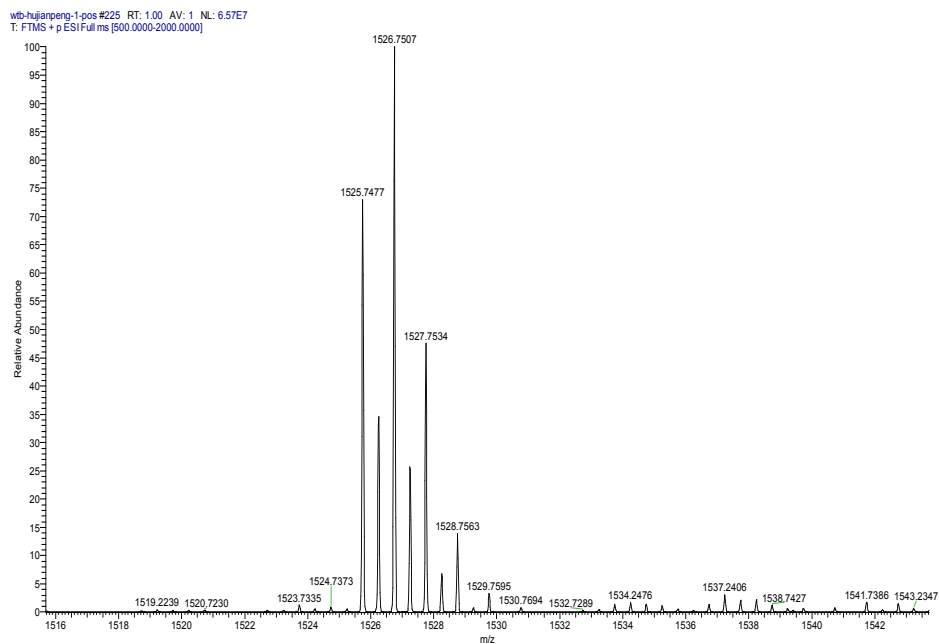

**Figure S5.** The ESI/MS of TR in CH<sub>3</sub>CN.

UV-vis of sensor (**TR**) for different aqueous systems of  $\text{Hg}^{2+}$ .

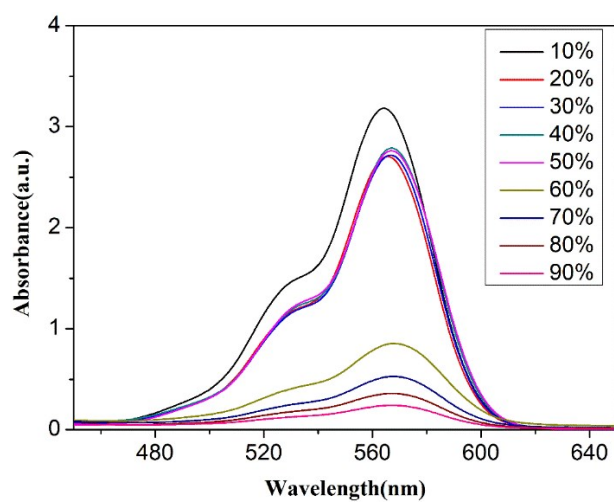

**Figure S6.** UV-vis of sensor **TR** for different aqueous systems of  $\text{Hg}^{2+}$ .

Fluorescence spectra of sensor **TR** for different aqueous systems of  $\text{Fe}^{3+}$ .

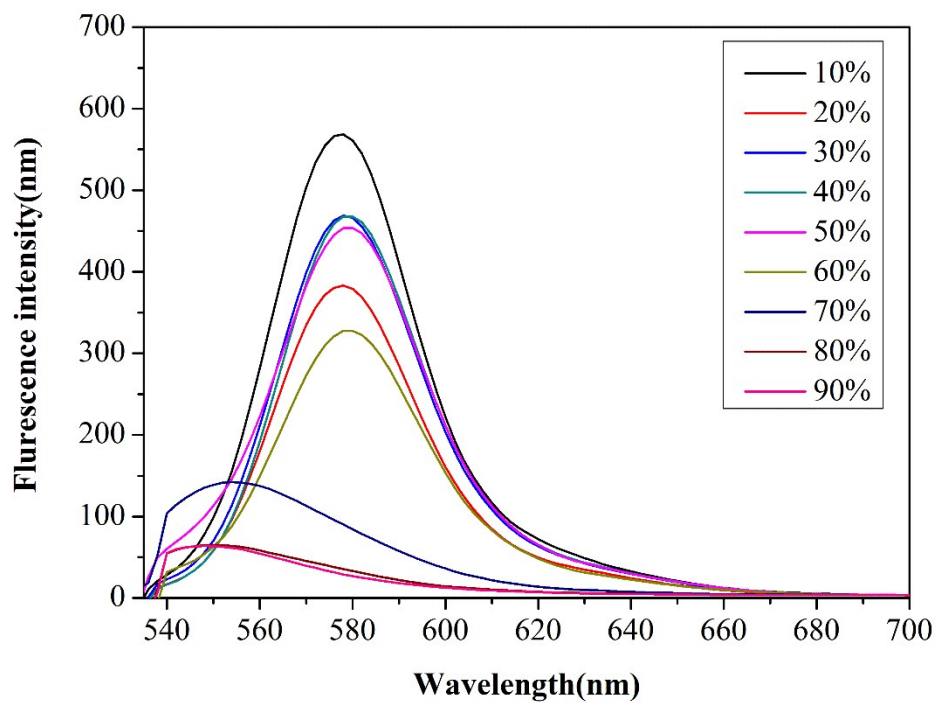

**Figure S7.** Fluorescence spectra of sensor **TR** for different aqueous systems of  $\text{Fe}^{3+}$ .

Determine of the UV-vis detection limit for  $\text{Hg}^{2+}$

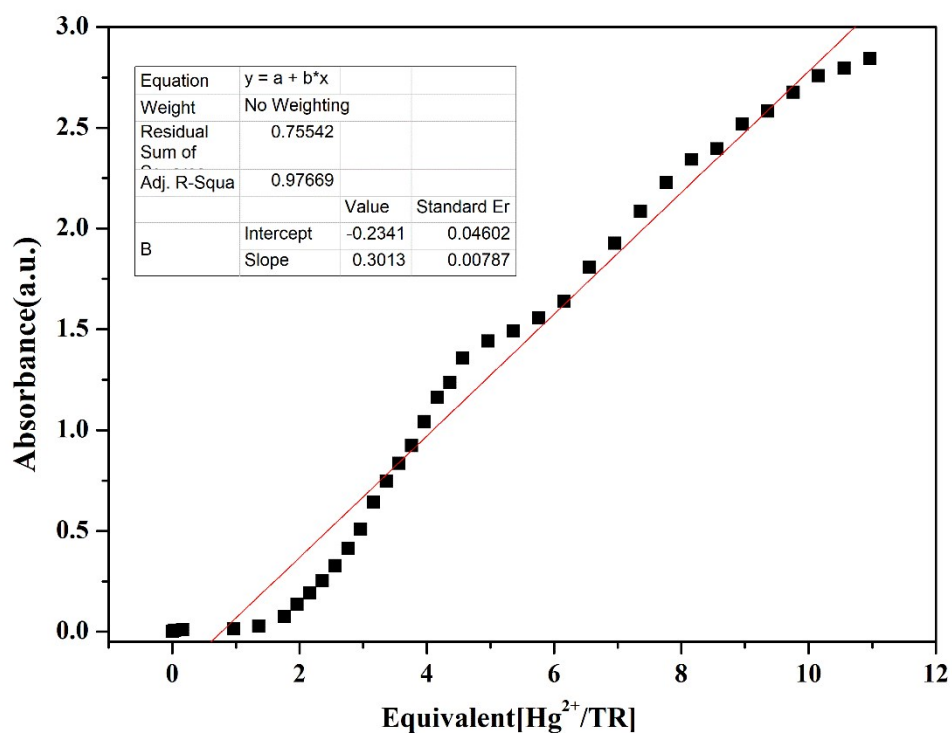

Linear Equation:  $Y = 0.3013 X - 0.2341$        $R = 0.97669$

$$S = 0.3013 \times 10^6 \quad \delta = \sqrt{\frac{\sum(A-\bar{A})^2}{(N-1)}} = 0.002473 (N = 20) \quad K = 3$$

$$\text{LOD} = K \times \delta / S = 2.46 \times 10^{-8} \text{ M}$$

**Figure S8.** The photograph of the UV-vis absorption spectral linear range for  $\text{Hg}^{2+}$ .

Determine of the fluorescent detection limit for Fe<sup>3+</sup>

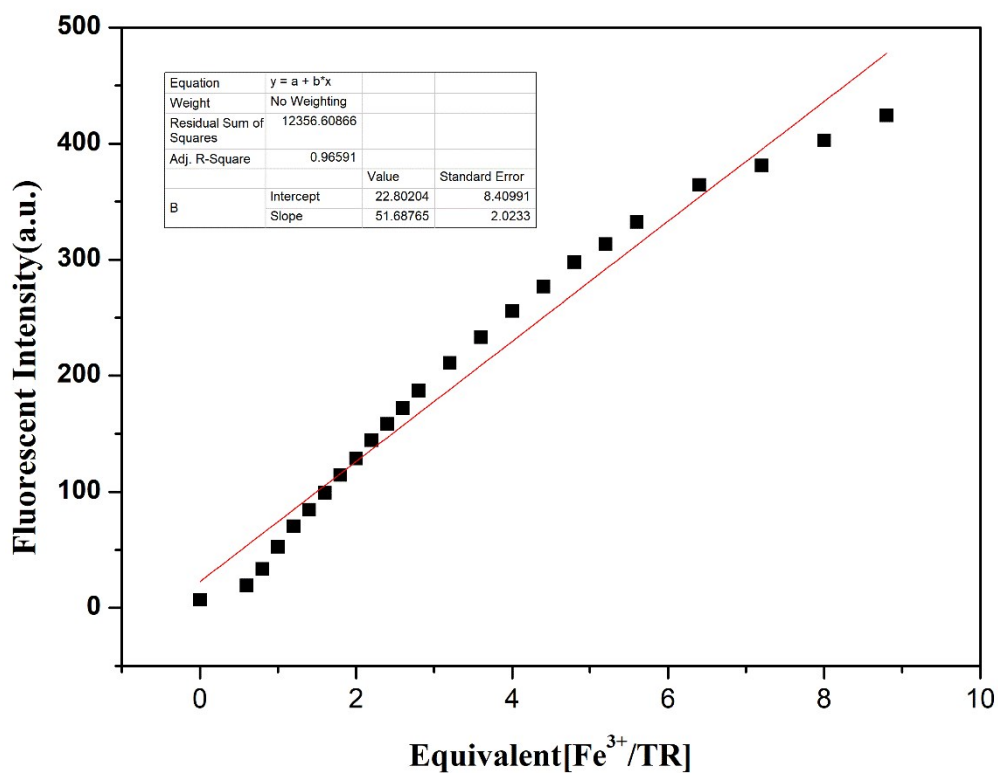

Linear Equation:  $Y = 51.68765X + 22.80204$       $R = 0.6591$

$$S = 51.68765 \times 10^6 \quad \delta = \sqrt{\frac{\sum(F-\bar{F})^2}{(N-1)}} = 0.707935 \quad (N = 20) \quad K = 3$$

$$\text{LOD} = K \times \delta/S = 4.11 \times 10^{-8} \text{ M}$$

**Figure S9.** The photograph of the fluorescent spectrum linear range for Fe<sup>3+</sup>.

Fluorescence spectra of **TR** in various pH values EtOH /H<sub>2</sub>O (9:1, v/v) HEPES buffer solution

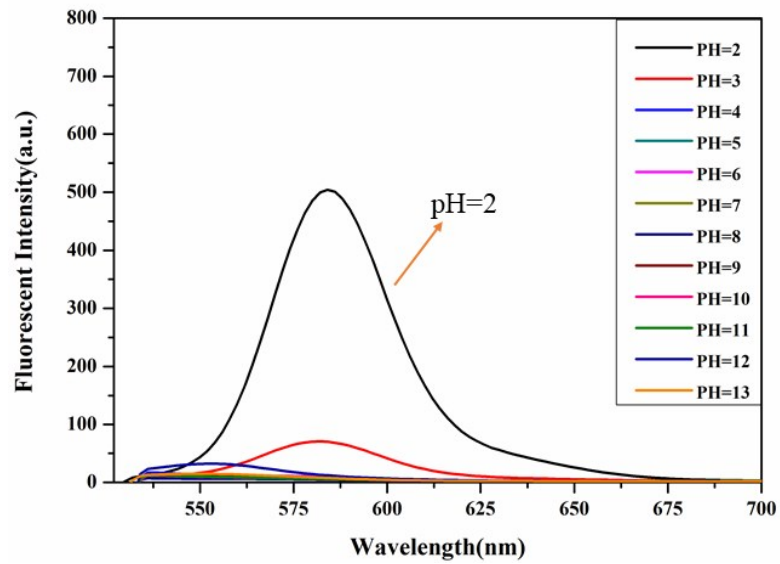

**Figure S10.** Fluorescence spectra of **TR** in various pH values EtOH /H<sub>2</sub>O (9:1, v/v) HEPES buffer solution

Mass spectrum between **TR** and  $\text{Hg}^{2+}$ .

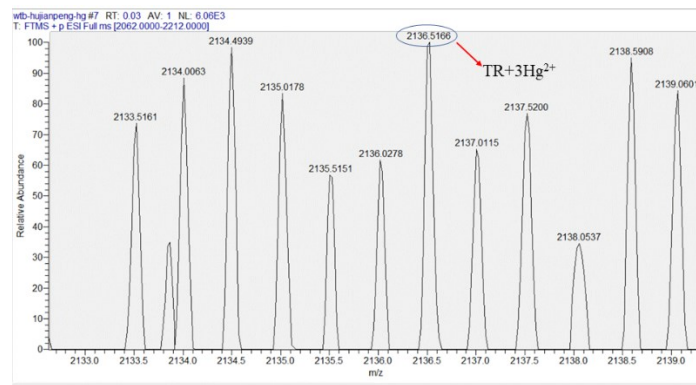

**Figure S11.** Mass spectrum between **TR** and  $\text{Hg}^{2+}$ .

Mass spectrum between TR and Fe<sup>3+</sup>.

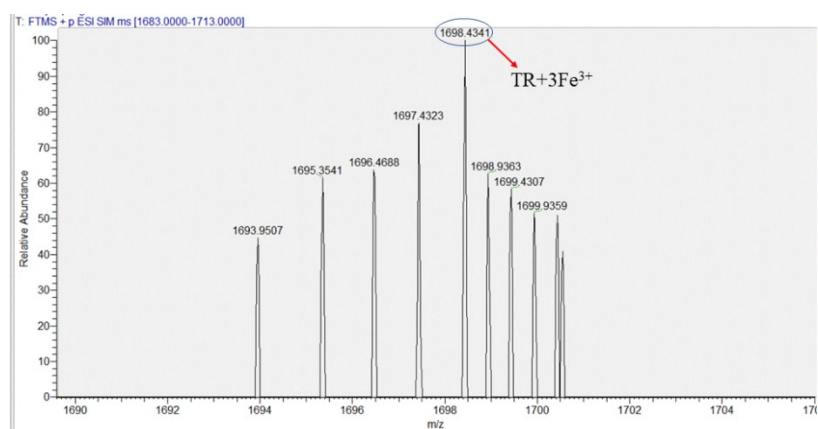

Figure S12. Mass spectrum between TR and Fe<sup>3+</sup>.



IR spectra of compound **TR**, **TR+Hg<sup>2+</sup>** and **TR+Fe<sup>3+</sup>**

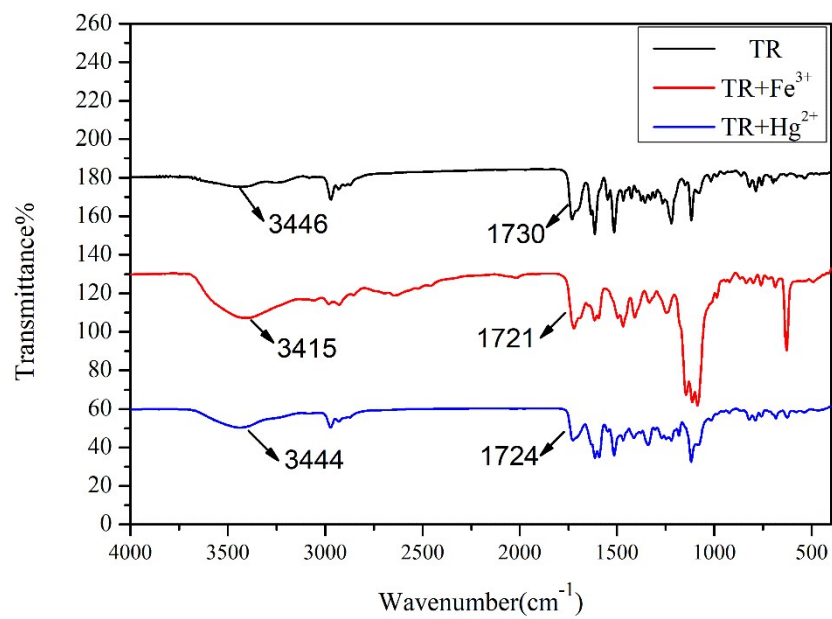

**Figure S13.** IR spectra of compound **TR**, **TR+Hg<sup>2+</sup>** and **TR+Fe<sup>3+</sup>**.
